# Supplementary material for: Quit Now? Quit Soon? Quit When You’re Ready? Insights About Target Quit Dates for Smoking Cessation From an Online Quit Date Tool
Source: PubMed Central journal article supplement (PMC3958692; doi:10.2196/jmir.3086), 2014-02-17
Supplement: jmir_v16i2e55_app1.pdf [file jmir_v16i2e55_app1.pdf]

|                                          | <b>QD<br/>n=576</b> | <b>No QD<br/>n=62</b> | <b>P-<br/>value<sup>a</sup></b> |
|------------------------------------------|---------------------|-----------------------|---------------------------------|
| <b>DEMOGRAPHIC VARIABLES<sup>b</sup></b> |                     |                       |                                 |
| Age, years, mean (SD)                    | 37.09 (11.34)       | 34.79<br>(11.62)      | 0.131                           |
| Gender, n (%)                            |                     |                       | 0.009                           |
| Female                                   | 292 (50.7)          | 20 (32.3)             |                                 |
| Race, n (%)                              |                     |                       | 0.994                           |
| White                                    | 507 (88.0)          | 54 (87.1)             |                                 |
| Non-White                                | 69 (12.0)           | 8 (12.9)              |                                 |
| Ethnicity (Hispanic), n (%)              | 18 (3.1)            | 3 (4.8)               | 0.731                           |
| Education, n (%)                         |                     |                       | 0.151                           |
| High school or less                      | 124 (21.5)          | 10 (16.1)             |                                 |
| Some college                             | 269 (46.7)          | 37 (59.7)             |                                 |
| College 4+ years                         | 183 (31.8)          | 15 (24.2)             |                                 |
| Employment, n (%)                        |                     |                       | 0.761                           |
| Employed full time                       | 409 (71.0)          | 45 (73.8)             |                                 |
| Other <sup>c</sup>                       | 167 (29.0)          | 16 (26.2)             |                                 |
| Income, n (%)                            |                     |                       | 0.655                           |
| Low income (<\$40,000)                   | 262 (45.8)          | 26 (41.9)             |                                 |
| High income (>\$40,000)                  | 310 (54.2)          | 36 (58.1)             |                                 |
| <b>SMOKING VARIABLES</b>                 |                     |                       |                                 |
| Cigarettes per day, mean (SD)            | 19.63 (9.17)        | 20.10<br>(10.69)      | 0.708                           |
| Time to first cigarette, n (%)           |                     |                       | 0.793                           |
| Within 30 minutes                        | 432 (75.0)          | 45 (72.6)             |                                 |
| After 30 minutes                         | 144 (25.0)          | 17 (27.4)             |                                 |
| Duration of last quit attempt, n (%)     |                     |                       | 0.463                           |
| ≤3 days                                  | 298 (56.2)          | 27 (50.0)             |                                 |
| 4+ days                                  | 232 (43.8)          | 27 (50.0)             |                                 |
| Desire to quit, mean (SD)                | 9.07 (1.27)         | 9.26 (1.16)           | 0.263                           |
| Confidence in quitting, mean (SD)        | 6.28 (2.27)         | 6.55 (2.24)           | 0.369                           |
| <b>PSYCHOSOCIAL VARIABLES</b>            |                     |                       |                                 |
| Health status, n (%)                     |                     |                       | 0.076                           |
| Excellent                                | 53 (9.2)            | 7 (11.3)              |                                 |
| Very good                                | 214 (37.2)          | 13 (21.0)             |                                 |
| Good                                     | 198 (34.4)          | 25 (40.3)             |                                 |
| Fair/Poor <sup>d</sup>                   | 110 (19.1)          | 17 (27.4)             |                                 |
| Illness caused by smoking, n (%)         | 341 (59.3)          | 34 (54.8)             | 0.587                           |
| Spouse smokes, n (%)                     | 157 (45.5)          | 24 (64.9)             | 0.039                           |
| 1+ smokers in house, n (%)               | 102 (17.7)          | 12 (19.4)             | 0.883                           |
| Temptations Inventory, mean (SD)         | 3.89 (0.52)         | 3.90 (0.47)           | 0.810                           |
| Confidence Inventory, mean (SD)          | 2.82 (0.58)         | 2.68 (0.56)           | 0.075                           |
| Perceived Stress Scale, mean (SD)        | 6.21 (3.19)         | 5.89 (3.34)           | 0.449                           |
| CES-D Scale, Mean (SD) <sup>e</sup>      | 9.28 (5.78)         | 9.28 (5.77)           | 0.998                           |

<sup>a</sup> = Non-parametric test (categorical) or ANOVA (continuous) used.

<sup>b</sup> = Participants were able to refuse answering a question or respond "I don't know". Sample sizes are follows: employment, 488; income, 634; duration of last quit attempt, 584; health status, 637; illness caused by smoking, 637; spouse smokes, 382 (only asked among individuals with spouse).

<sup>c</sup> = Includes part-time employment, retired, student, homemaker, and unemployed.

<sup>d</sup> = Collapsed "Fair" and "Poor" categories due to small cell counts.

<sup>e</sup> = CES-D: Center for Epidemiologic Studies-Depression Scale.
